# Supplementary material for: Priorities for tuberculosis research: a systematic review
Source: PubMed Central journal article supplement (PMC2992175; doi:10.1016/s1473-3099(10)70201-2), 2010-12-10
Supplement: mmc1.pdf [file mmc1.pdf]

## Supplementary webappendix

This webappendix formed part of the original submission and has been peer reviewed.  
We post it as supplied by the authors.

Supplement to: Rylance J, Pai M, Lienhardt C, Garner P. Priorities for tuberculosis research: a systematic review. *Lancet Infect Dis* 2010; published online Nov 2.  
DOI:10.1016/S1473-3099(10)70201-2.

### **Webappendix: Excluded articles from those initially short-listed**

| <b>Author</b>                  | <b>Title</b>                                                                                                                       | <b>Reason for exclusion</b>                                                                                             |
|--------------------------------|------------------------------------------------------------------------------------------------------------------------------------|-------------------------------------------------------------------------------------------------------------------------|
| Casenghi et al <sup>1</sup>    | New Approaches to Filling the Gap in Tuberculosis Drug Discovery                                                                   | Details barriers and solutions to organization of novel drug research. No specific TB questions.                        |
| Chakhaiyar et al <sup>2</sup>  | Defining the mandate of tuberculosis research in a postgenomic era                                                                 | Describes state of the art and current research only.                                                                   |
| Chopra <sup>3</sup>            | Achieving the health Millennium Development Goals for South Africa: challenges and priorities                                      | No research questions identified; a programmatic statement on best practice in South Africa.                            |
| EASAC <sup>4</sup>             | Drug-resistant tuberculosis: challenges, consequences and strategies for control                                                   | Comprehensively reported in a peer reviewed article. <sup>5</sup> Excluded to avoid duplication.                        |
| Feuer C et al <sup>6</sup>     | Tuberculosis Research & Development: A Critical Analysis                                                                           | An overview of funding arrangements and sources. No research questions or priorities identified.                        |
| Friedland G et al <sup>7</sup> | Tuberculosis and HIV Co-infection: Current State of Knowledge and Research Priorities                                              | Editorial accompanying and introducing other articles only.                                                             |
| Ganguly et al <sup>8</sup>     | Priorities in tuberculosis research in India                                                                                       | No research questions identified; a programmatic statement on current practice in India.                                |
| IUALTD <sup>9</sup>            | Priorities for research in lung health                                                                                             | Not specific for tuberculosis.                                                                                          |
| Katz et al <sup>10</sup>       | Setting the agenda: A new model for collaborative tuberculosis epidemiologic research                                              | Describes the structure and planned research for a single organization (Tuberculosis Epidemiologic Studies Consortium). |
| Manley et al <sup>11</sup>     | The Programme for Global Paediatric Research                                                                                       | Describes the conception of The Programme for Global Paediatric Research. No TB specific questions.                     |
| Menzies et al <sup>12</sup>    | Meta-analysis: New Tests for the Diagnosis of Latent Tuberculosis Infection: Areas of Uncertainty and Recommendations for Research | Meta-analysis.                                                                                                          |
| Narayanan et al <sup>13</sup>  | Shifting the focus of tuberculosis research in India                                                                               | Description of historical and current / ongoing research only.                                                          |
| NIAID <sup>14</sup>            | NIAID Research Agenda: Multidrug-Resistant and                                                                                     | Comprehensively reported in a peer reviewed article. <sup>15</sup> Excluded to avoid                                    |

|                                                                 |                                                                                  |                                                                                    |
|-----------------------------------------------------------------|----------------------------------------------------------------------------------|------------------------------------------------------------------------------------|
|                                                                 | Extensively Drug-Resistant Tuberculosis                                          | duplication.                                                                       |
| WHO Task Force on Priorities for Equity in Health <sup>16</sup> | Priorities for research to take forward the health equity policy agenda          | Not specific to tuberculosis.                                                      |
| Rengasamy et al <sup>17</sup>                                   | Respiratory protection against bioaerosols: Literature review and research needs | Not specific to tuberculosis.                                                      |
| Smith et al <sup>18</sup>                                       | Indoor air pollution in developing countries: recommendations for research       | Not specific to tuberculosis.                                                      |
| Walker et al <sup>19</sup>                                      | The second Geneva Consensus: Recommendations for novel live TB vaccines          | No research questions identified; describes current work and regulatory framework. |
| Young et al <sup>20</sup>                                       | Ten years of research progress and what's to come                                | Describes existing research pipeline.                                              |

1 Casenghi M, Cole ST, Nathan CF. New approaches to filling the gap in tuberculosis drug discovery. *PLoS Med* 2007; **4**: e293.

2 Chakhaiyar P, Hasnain SE. Defining the mandate of tuberculosis research in a postgenomic era. *Med Princ Pract* 2004; **13**: 177–84.

3 Chopra M, Lawn JE, Sanders D, et al. Achieving the health Millennium Development Goals for South Africa: challenges and priorities. *Lancet* 2009; **374**: 1023–31.

4 European Academies Science Advisory Council (EASAC). Drug-resistant tuberculosis: challenges, consequences and strategies for control: EASAC, March, 2009 [http://www.easac.eu/fileadmin/PDF\\_s/reports\\_statements/Drug-resistant.pdf](http://www.easac.eu/fileadmin/PDF_s/reports_statements/Drug-resistant.pdf) (accessed May 21, 2010).

5 Fears R, Kaufmann S, Ter Meulen V, Zumla A. Drug-resistant tuberculosis in the European Union: opportunities and challenges for control. *Tuberculosis* 2010; **90**: 182–87.

6 Feuer C. Tuberculosis research and development: a critical analysis (2nd edn): Treatment Action Group, October 2006 <http://www.stoptb.org/assets/documents/research/tbrandd2.pdf> (accessed Aug 28, 2008).

7 Friedland G, Churchyard GJ, Nardell E. Tuberculosis and HIV coinfection: current state of knowledge and research priorities. *J Infect Dis* 2007; **196**: S1–3.

8 Ganguly NK, Walia K. Priorities in tuberculosis research in India. *Indian J Pediatr* 2002; **69**: S50–56.

9 International Union Against Tuberculosis and Lung Disease (IUATLD), and the International Development Research Centre (IDRC). Priorities for research in lung health. Paris, 9–11 December 1997. *Int J Tuberc Lung Dis* 1998 **2**: 1046–48.

10 Katz D, Albalak R, Wing JS, Combs V, Tuberculosis Epidemiologic Studies Consortium. Setting the agenda: a new model for collaborative tuberculosis epidemiologic research. *Tuberculosis* 2007; **87**: 1–6.

11 Manley M, Zipursky A. The programme for global paediatric research. *Arch Dis Child* 2005; **90**: 763–65.

12 Menzies D, Pai M, Comstock G. Meta-analysis: new tests for the diagnosis of latent tuberculosis infection: areas of uncertainty and recommendations for research. *Ann Intern Med* 2007; **146**: 340–54.

13 Narayanan PR, Garg R, Santha T, Kumaran PP. Shifting the focus of tuberculosis research in India. *Tuberculosis* 2003; **83**: 135–42.

- 14 NIAID Tuberculosis Working Group. NIAID research agenda: multidrug-resistant and extensively drug-resistant tuberculosis. National Institutes of Health; June 6, 2007 <http://www.niaid.nih.gov/topics/tuberculosis/Research/Documents/mdrxdresearchagenda.pdf> (accessed Aug 28, 2008).
- 15 Fauci AS. Multidrug-resistant and extensively drug-resistant tuberculosis: the National Institute of Allergy and Infectious Diseases research agenda and recommendations for priority research. *J Infect Dis* 2008; **197**: 1493–98.
- 16 Ostlin P, Braveman P, Dachs JN, et al. Priorities for research to take forward the health equity policy agenda. *Bull World Health Organ* 2005; **83**: 948–53.
- 17 Rengasamy A, Zhuang Z, Berryann R. Respiratory protection against bioaerosols: literature review and research needs. *Am J Infect Control* 2004; **32**: 345–54.
- 18 Smith KR. Indoor air pollution in developing countries: recommendations for research. *Indoor Air* 2002; **12**: 198–207.
- 19 Walker KB, Brennan MJ, Ho MM, et al. The second Geneva Consensus: recommendations for novel live TB vaccines. *Vaccine* 2010; **28**: 2259–70.
- 20 Young DB. Ten years of research progress and what's to come. *Tuberculosis* 2003; **83**: 77–81.
